# Supplementary material
Source: Royal Society of Chemistry journal article supplement (doi:10.1039/d6cp01194b)
Supplement: d6cp01194b1.pdf [file d6cp01194b1.pdf]

## Supporting Information

### A Systematic Study of Prussian Blue Analogs as Cathode Materials for Calcium Ion Batteries and Interstitial Water Regulation: First-principles Calculations

Ying Jiang<sup>a, †</sup>, Weiqi Song<sup>a, †</sup>, Yue Zhao<sup>a</sup>, Hongye Zhang<sup>a</sup>, Feihu Zou<sup>a</sup>, Yize Niu<sup>a</sup>, Qiang Li<sup>a, b, \*</sup>,  
and Yuanyuan Pan<sup>a, \*</sup>

<sup>a</sup>College of Physics, Center for Marine Observation and Communications, Qingdao University,  
Qingdao 266071, China

<sup>b</sup>University of Waterloo, Waterloo, Ontario N2L3G1, Canada

<sup>†</sup>These authors contributed equally to the work.

\*E-mail of the corresponding authors: [liqiang@qdu.edu.cn](mailto:liqiang@qdu.edu.cn) ; [panyy@qdu.edu.cn](mailto:panyy@qdu.edu.cn)

Table S1. The band gaps in  $\text{Ca}_x\text{MFe}(\text{CN})_6 \cdot n\text{H}_2\text{O}$  ( $\text{M} = \text{Mn, Fe, and Co}$ ,  $0 \leq x \leq 1$ ,  $n = 0$  and 2).

| band<br>gap<br>(eV) | $\text{Ca}_x\text{MnFe}(\text{CN})_6$ | $\text{Ca}_x\text{MnFe}(\text{CN})_6$<br>$\cdot 2\text{H}_2\text{O}$ | $\text{Ca}_x\text{FeFe}(\text{CN})_6$ | $\text{Ca}_x\text{FeFe}(\text{CN})_6$<br>$\cdot 2\text{H}_2\text{O}$ | $\text{Ca}_x\text{CoFe}(\text{CN})_6$ | $\text{Ca}_x\text{CoFe}(\text{CN})_6$<br>$\cdot 2\text{H}_2\text{O}$ |
|---------------------|---------------------------------------|----------------------------------------------------------------------|---------------------------------------|----------------------------------------------------------------------|---------------------------------------|----------------------------------------------------------------------|
| $x = 1$             | 1.59                                  | 2.76                                                                 | 1.44                                  | 2.56                                                                 | 1.51                                  | 1.88                                                                 |
| $x = 0.5$           | 1.04                                  | 0.29                                                                 | 1.57                                  | 0.78                                                                 | 1.64                                  | 0.48                                                                 |
| $x = 0$             | 1.02                                  | 0.00                                                                 | 1.26                                  | 0.94                                                                 | 1.39                                  | 0.36                                                                 |

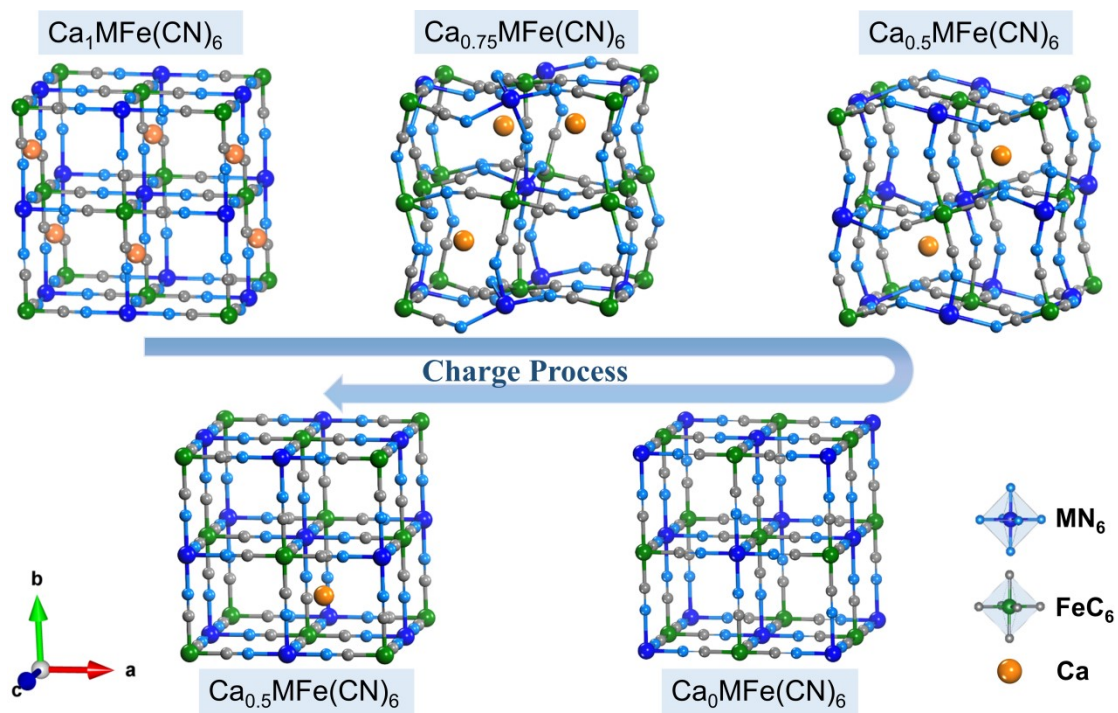

Figure S1. Schematic diagram of the lattice structure evolution during  $\text{Ca}^{2+}$  extraction in  $\text{Ca}_x\text{MFe}(\text{CN})_6$  ( $M = \text{Mn}, \text{Fe}, \text{and Co}; x = 1, 0.75, 0.5, 0.25, 0$ ).

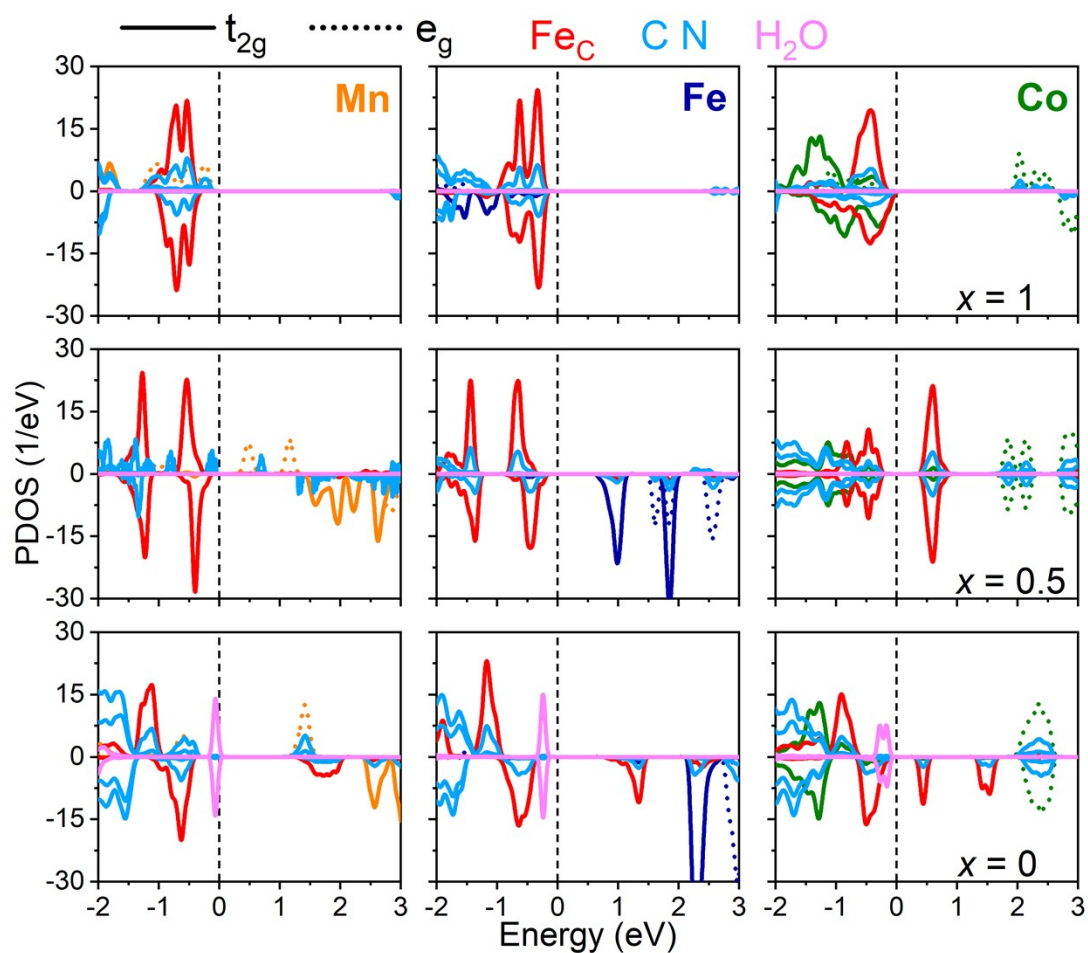

Figure S2. PDOS of  $\text{Ca}_x\text{MFe}(\text{CN})_6 \cdot 2\text{H}_2\text{O}$  ( $\text{M} = \text{Mn}, \text{Fe}, \text{and Co}; x = 1, 0.5, 0$ ) containing interstitial water. The M in the left, middle, and right columns correspond to Mn, Fe, and Co, respectively. The top, middle, and bottom rows correspond to different cation contents  $x = 1, 0.5,$  and  $0$ , respectively. The solid and dashed lines represent the  $t_{2g}$  and  $e_g$  orbitals, respectively. The Fermi level is set to zero.

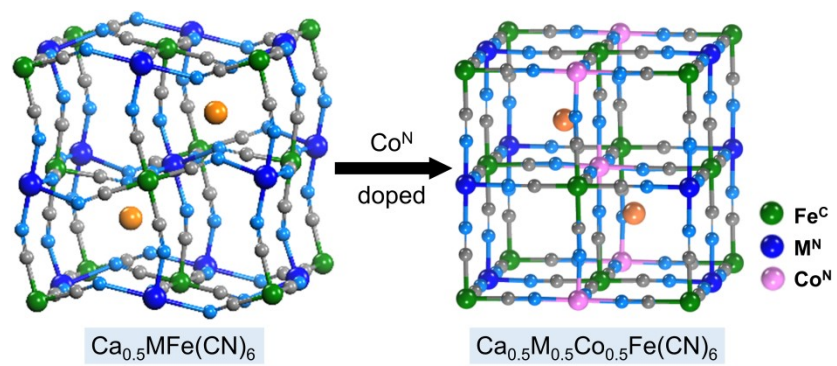

Figure S3. Schematic diagram of the lattice structure for the  $\text{Ca}_{0.5}\text{MFe}(\text{CN})_6$  ( $\text{M} = \text{Mn}$  and  $\text{Fe}$ ) systems before and after Co doping.

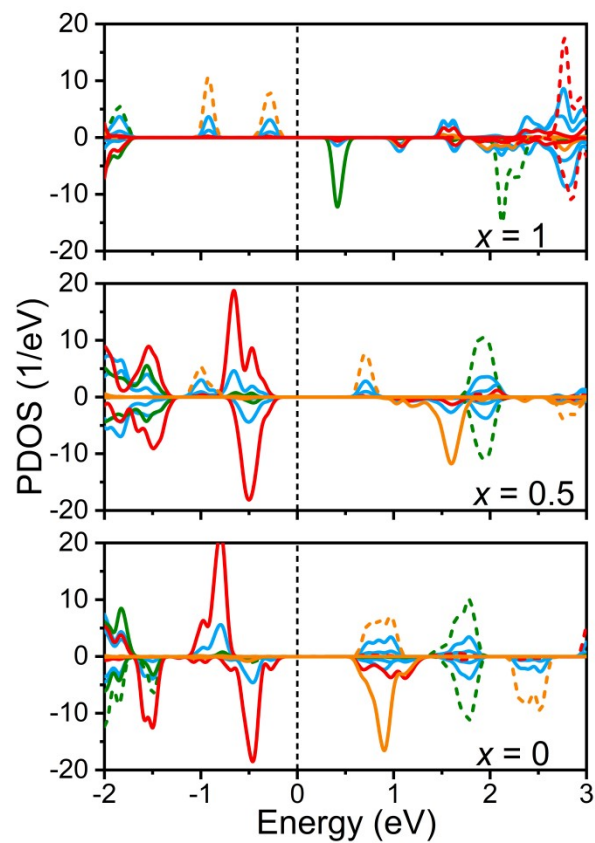

Figure S4. PDOS of  $\text{Ca}_x\text{Co}_{0.5}\text{Mn}_{0.5}\text{Fe}(\text{CN})_6$  ( $x = 1, 0.5, 0$ ). The top, middle, and bottom rows correspond to different cation contents  $x = 1, 0.5$ , and  $0$ , respectively. The solid and dashed lines represent the  $t_{2g}$  and  $e_g$  orbitals, respectively. The Fermi level is set to zero.

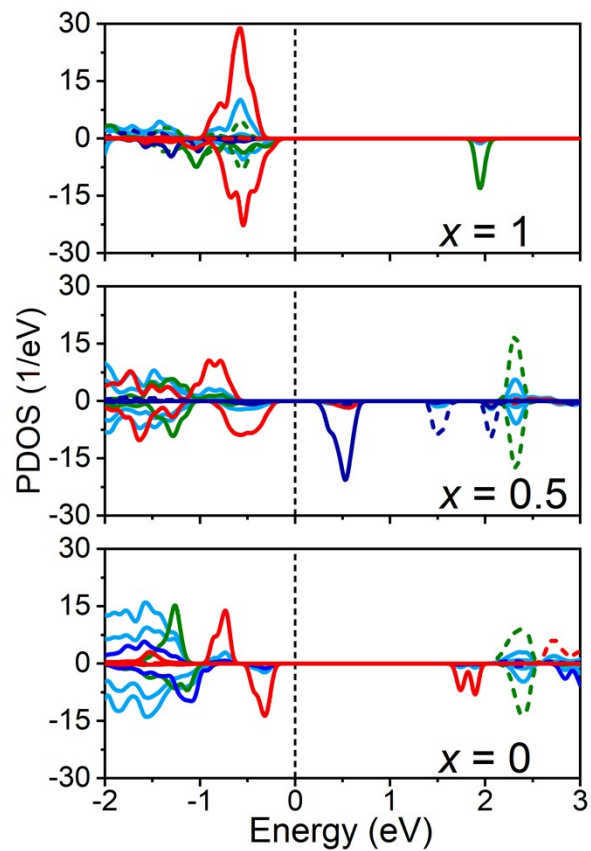

Figure S5. PDOS of  $\text{Ca}_x\text{Co}_{0.5}\text{Fe}_{0.5}\text{Fe}(\text{CN})_6$  ( $x = 1, 0.5, 0$ ). The top, middle, and bottom rows correspond to different cation contents  $x = 1, 0.5,$  and  $0$ , respectively. The solid and dashed lines represent the  $t_{2g}$  and  $e_g$  orbitals, respectively. The Fermi level is set to zero.
